# Supplementary material
Source: MDPI journal article supplement (https://www.mdpi.com/2071-1050/10/11/4115)
Supplement: s1 [file s1]

## Attachment: Questionnaire

### Evaluation Index Questionnaire of Urban Living Environment Reconstruction in Wenchuan Earthquake-Stricken Areas

Number: \_\_\_\_\_ Survey Date: \_\_\_\_YY\_\_MM\_\_DD Residential Location: \_\_\_\_\_

#### 1. Personal Information

|                                |                                                                                                                                                     |
|--------------------------------|-----------------------------------------------------------------------------------------------------------------------------------------------------|
| Gender                         | ①Male ②Female                                                                                                                                       |
| Age (years old)                | ①Under 20 ②20-29 ③30-39 ④40-49 ⑤50-59 ⑥Over 60                                                                                                      |
| Number of households (persons) | ①1 ②2 ③3 ④4 ⑤5 ⑥6 ⑦7 ⑧8 (and above)                                                                                                                 |
| Occupation                     | ①Administrative staff ②Enterprise staff ③Career staff ④Peasant ⑤Freelancer ⑥Unemployed ⑦Retired ⑧Student ⑨Others_____                               |
| Degree of education            | ①Junior high school (and below) ②High school ③Vocational education ④Technical secondary school ⑤College ⑥Undergraduate ⑦Master's degree (and above) |
| Reconstruction mode            | ①Local unified construction ②Paired assistance ③Residential self-built ④Undecided ⑤Other_____                                                       |
| Housing area                   | _____m <sup>2</sup>                                                                                                                                 |

#### 2. Basic Problem

① What factors do you think are important for the ecological carrying capacity of a renewed urban environment? **(multiple choice)**

- ☐Disaster prevention management and education
- ☐Facility disaster prevention performance      ☐Disaster self-prevention and self-help
- ☐Security situations      ☐Disaster prevention spaces

② What factors do you think are important for the living environments of renewed urban environments? **(multiple choice)**

- ☐Housing quality      ☐Public service facilities      ☐Greening and landscaping
- ☐Municipal facilities      ☐Road traffic      ☐Community location

③ What factors do you think are important for the life reconstruction of renewed urban environments? **(multiple choice)**

- ☐Employment      ☐Community culture activities      ☐Community life services
- ☐Neighborhood relations      ☐Vulnerable groups      ☐Psychological reconstruction

④ What factors do you think are important for the cultural reconstruction of renewed urban environments? **(multiple choice)**

☐Reconstruction of regional characteristics      ☐Multicultural coexistence      ☐Historical and cultural inheritance  
☐National culture protection      ☐Development of contemporary culture

⑤ What factors do you think are important for the post-disaster reconstruction of cities and towns in disaster areas? **(multiple choice)**

☐Government organizations    ☐Public participation    ☐Ecological carrying capacity    ☐Living environment  
☐Life reconstruction    ☐Cultural reconstruction

⑥ In addition to the above contents of post-disaster reconstruction practices, what other factors do you think are important? Please list them: \_\_\_\_\_

**3. Extension Problem**      What factors do you think are the most important for post-disaster reconstruction practices (please check with √)

|                          |                      |                            |                                |                            |                                                         |                                         |                    |                     |               |
|--------------------------|----------------------|----------------------------|--------------------------------|----------------------------|---------------------------------------------------------|-----------------------------------------|--------------------|---------------------|---------------|
| Disaster prevention laws | Simulation exercises | Earthquake emergency plans | Seismic performance facilities | Building seismic intensity | Disaster prevention and residential self-help awareness | Community self-prevention organizations | Community security | Property management | Escape routes |
|--------------------------|----------------------|----------------------------|--------------------------------|----------------------------|---------------------------------------------------------|-----------------------------------------|--------------------|---------------------|---------------|

|                                         |                                       |                      |                         |                      |                               |                        |                        |                      |                        |
|-----------------------------------------|---------------------------------------|----------------------|-------------------------|----------------------|-------------------------------|------------------------|------------------------|----------------------|------------------------|
| Special places for disasters prevention | Per capita effective evacuation areas | Construction quality | Apartment layout design | Residential distance | Convenient service facilities | Health care facilities | Educational facilities | Pro-green /pro-water | Community public space |
|-----------------------------------------|---------------------------------------|----------------------|-------------------------|----------------------|-------------------------------|------------------------|------------------------|----------------------|------------------------|

|                                        |                      |                        |                    |                       |                               |                                                   |                          |                                   |                     |
|----------------------------------------|----------------------|------------------------|--------------------|-----------------------|-------------------------------|---------------------------------------------------|--------------------------|-----------------------------------|---------------------|
| Community environment landscape design | Municipal facilities | Fire safety facilities | Travel convenience | Road system integrity | Community planning and layout | Maturity of the surrounding supporting facilities | Employment opportunities | Employment information publishing | Employment training |
|----------------------------------------|----------------------|------------------------|--------------------|-----------------------|-------------------------------|---------------------------------------------------|--------------------------|-----------------------------------|---------------------|

|  |  |  |  |  |  |    |  |  |  |
|--|--|--|--|--|--|----|--|--|--|
|  |  |  |  |  |  | es |  |  |  |
|--|--|--|--|--|--|----|--|--|--|

|                                                     |                                 |                                        |                                  |                                                      |                                  |                            |                                                            |                                         |                                                          |
|-----------------------------------------------------|---------------------------------|----------------------------------------|----------------------------------|------------------------------------------------------|----------------------------------|----------------------------|------------------------------------------------------------|-----------------------------------------|----------------------------------------------------------|
| Com<br>munit<br>y<br>cultur<br>al<br>atmos<br>phere | Comm<br>unity<br>activit<br>ies | Comm<br>unity<br>organi<br>zation<br>s | Com<br>munit<br>y<br>servic<br>e | Exchan<br>ge of<br>neighb<br>orhood<br>reside<br>nts | Behav<br>ior<br>civiliz<br>ation | Barrier<br>-free<br>design | Basic<br>protect<br>ion of<br>vulner<br>able<br>group<br>s | Psych<br>ologic<br>al<br>resilie<br>nce | Psych<br>ologic<br>al<br>relief<br>organi<br>zation<br>s |
|-----------------------------------------------------|---------------------------------|----------------------------------------|----------------------------------|------------------------------------------------------|----------------------------------|----------------------------|------------------------------------------------------------|-----------------------------------------|----------------------------------------------------------|

|                                                         |                                              |                                        |                                                         |                                                   |                                                          |                                                      |                                                 |                                |                                                    |
|---------------------------------------------------------|----------------------------------------------|----------------------------------------|---------------------------------------------------------|---------------------------------------------------|----------------------------------------------------------|------------------------------------------------------|-------------------------------------------------|--------------------------------|----------------------------------------------------|
| Local<br>archit<br>ectura<br>l style<br>inherit<br>ance | Local<br>charac<br>teristic<br>landsc<br>ape | Urban<br>and<br>rural<br>exchan<br>ges | Dome<br>stic/<br>intern<br>ationa<br>l<br>excha<br>nges | Preser<br>vation<br>of<br>histori<br>cal<br>sites | Prote<br>ction<br>of<br>histor<br>ical<br>atmos<br>phere | Preser<br>vation<br>of<br>ethnic<br>archite<br>cture | Preser<br>vation<br>of<br>ethnic<br>cultur<br>e | Cultur<br>al<br>innova<br>tion | Sustai<br>nable<br>cultur<br>al<br>develo<br>pment |
|---------------------------------------------------------|----------------------------------------------|----------------------------------------|---------------------------------------------------------|---------------------------------------------------|----------------------------------------------------------|------------------------------------------------------|-------------------------------------------------|--------------------------------|----------------------------------------------------|
